# Supplementary material
Source: MDPI journal article supplement (https://www.mdpi.com/2673-4591/37/1/109)

# Physicochemical, Microbiological and Sensory Characterization of Halloumi Cheese Fortified with Garlic (*Allium sativum*) and Pepper (*Piper nigrum*)

Aravindi Nipunika Gamage, Rajivini Jeyasiri, Dinelka Dananji Hettiarachchi, Sachini Sandaranga Munasinghe, Nadeesha Dilrukshi \*

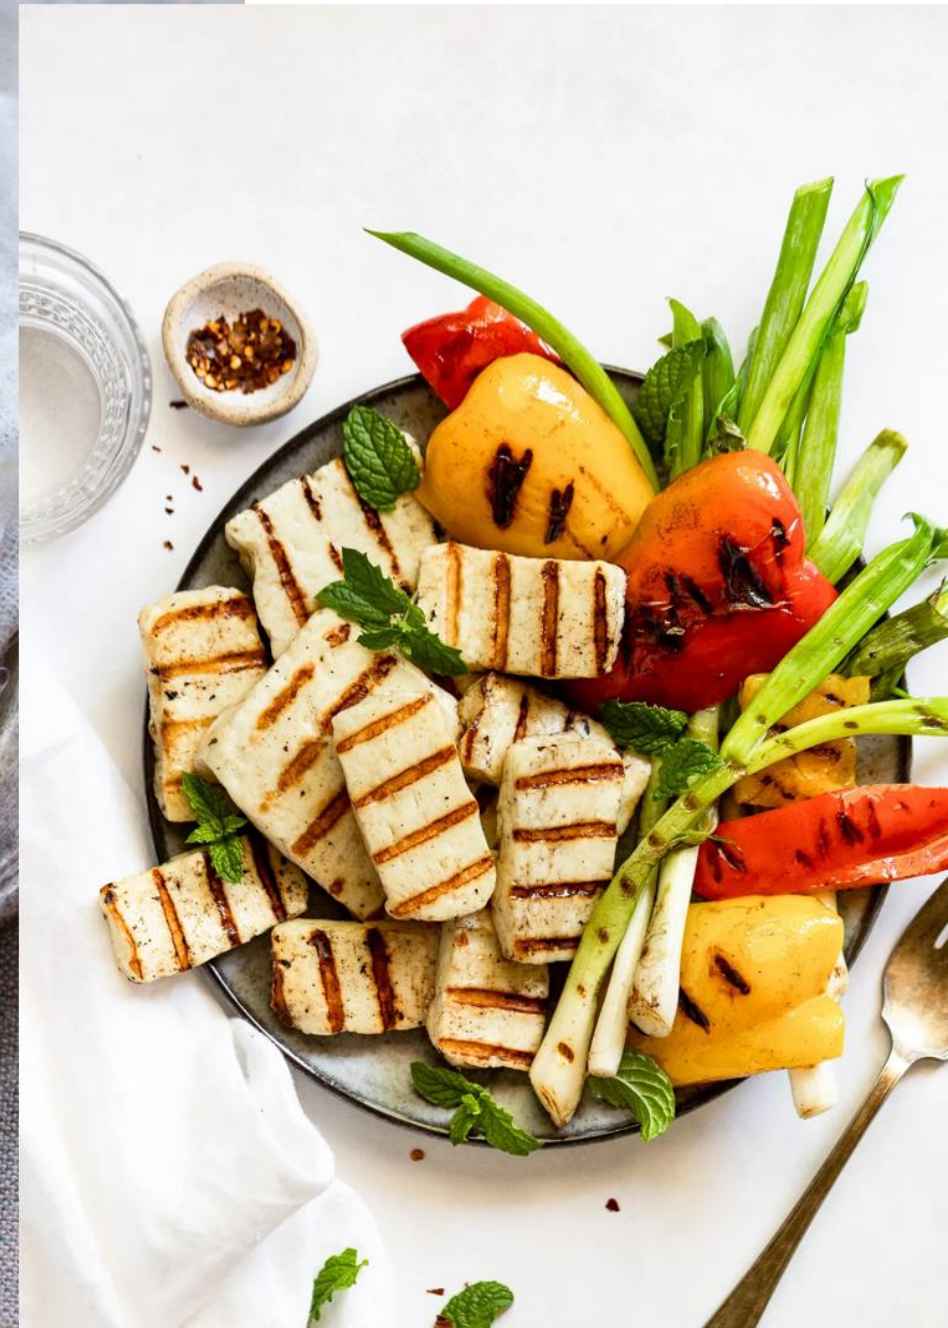

✓ Halloumi cheese ?

1

✓ Rising awareness on the health benefits of Halloumi cheese ?

2

✓ Market trends?

3

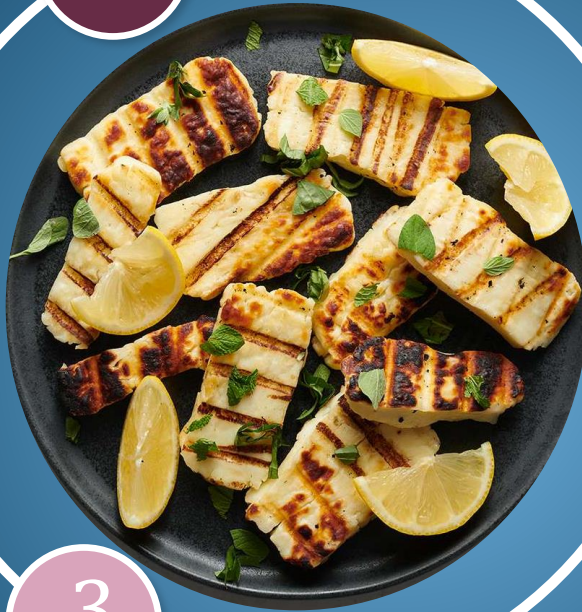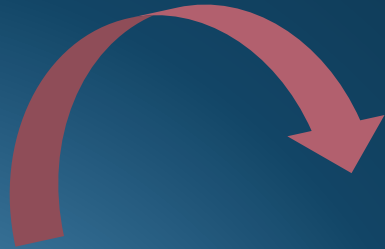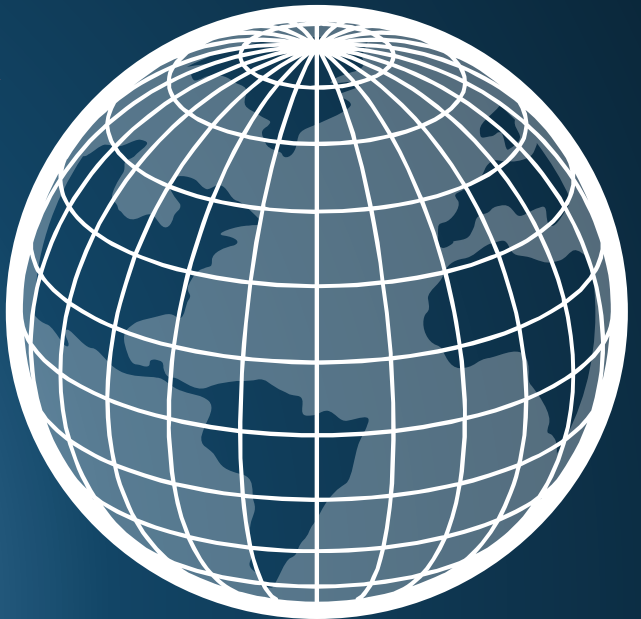

Global Halloumi Cheese market < USD 454.7 million in 2021.

The market is further expected to grow in the forecast period of 2023-2028 at a CAGR of 10.5% to reach over USD 827.7 million by 2027.

# Objectives

- To develop a cow's milk Halloumi cheese fortified with Garlic and Pepper
- To evaluate the,
  - ✓ physicochemical properties
  - ✓ microbiological shelf life and
  - ✓ consumer perception,  
of Halloumi cheese fortified with Garlic and Pepper

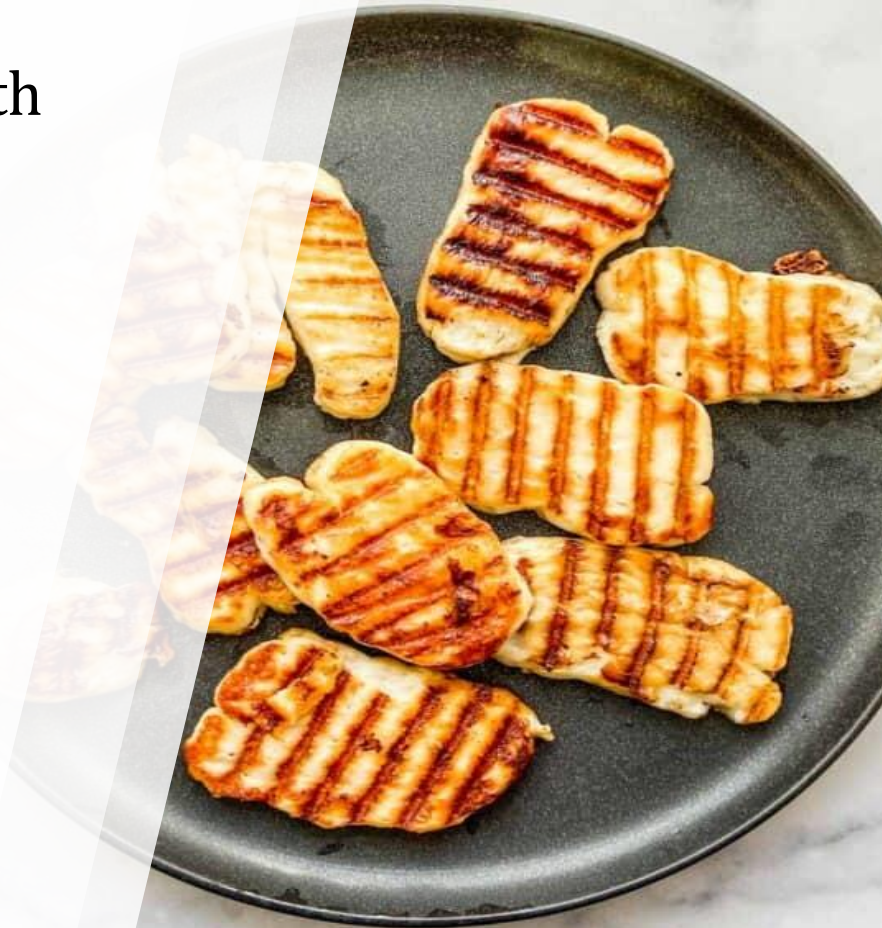

# Manufacturing Process

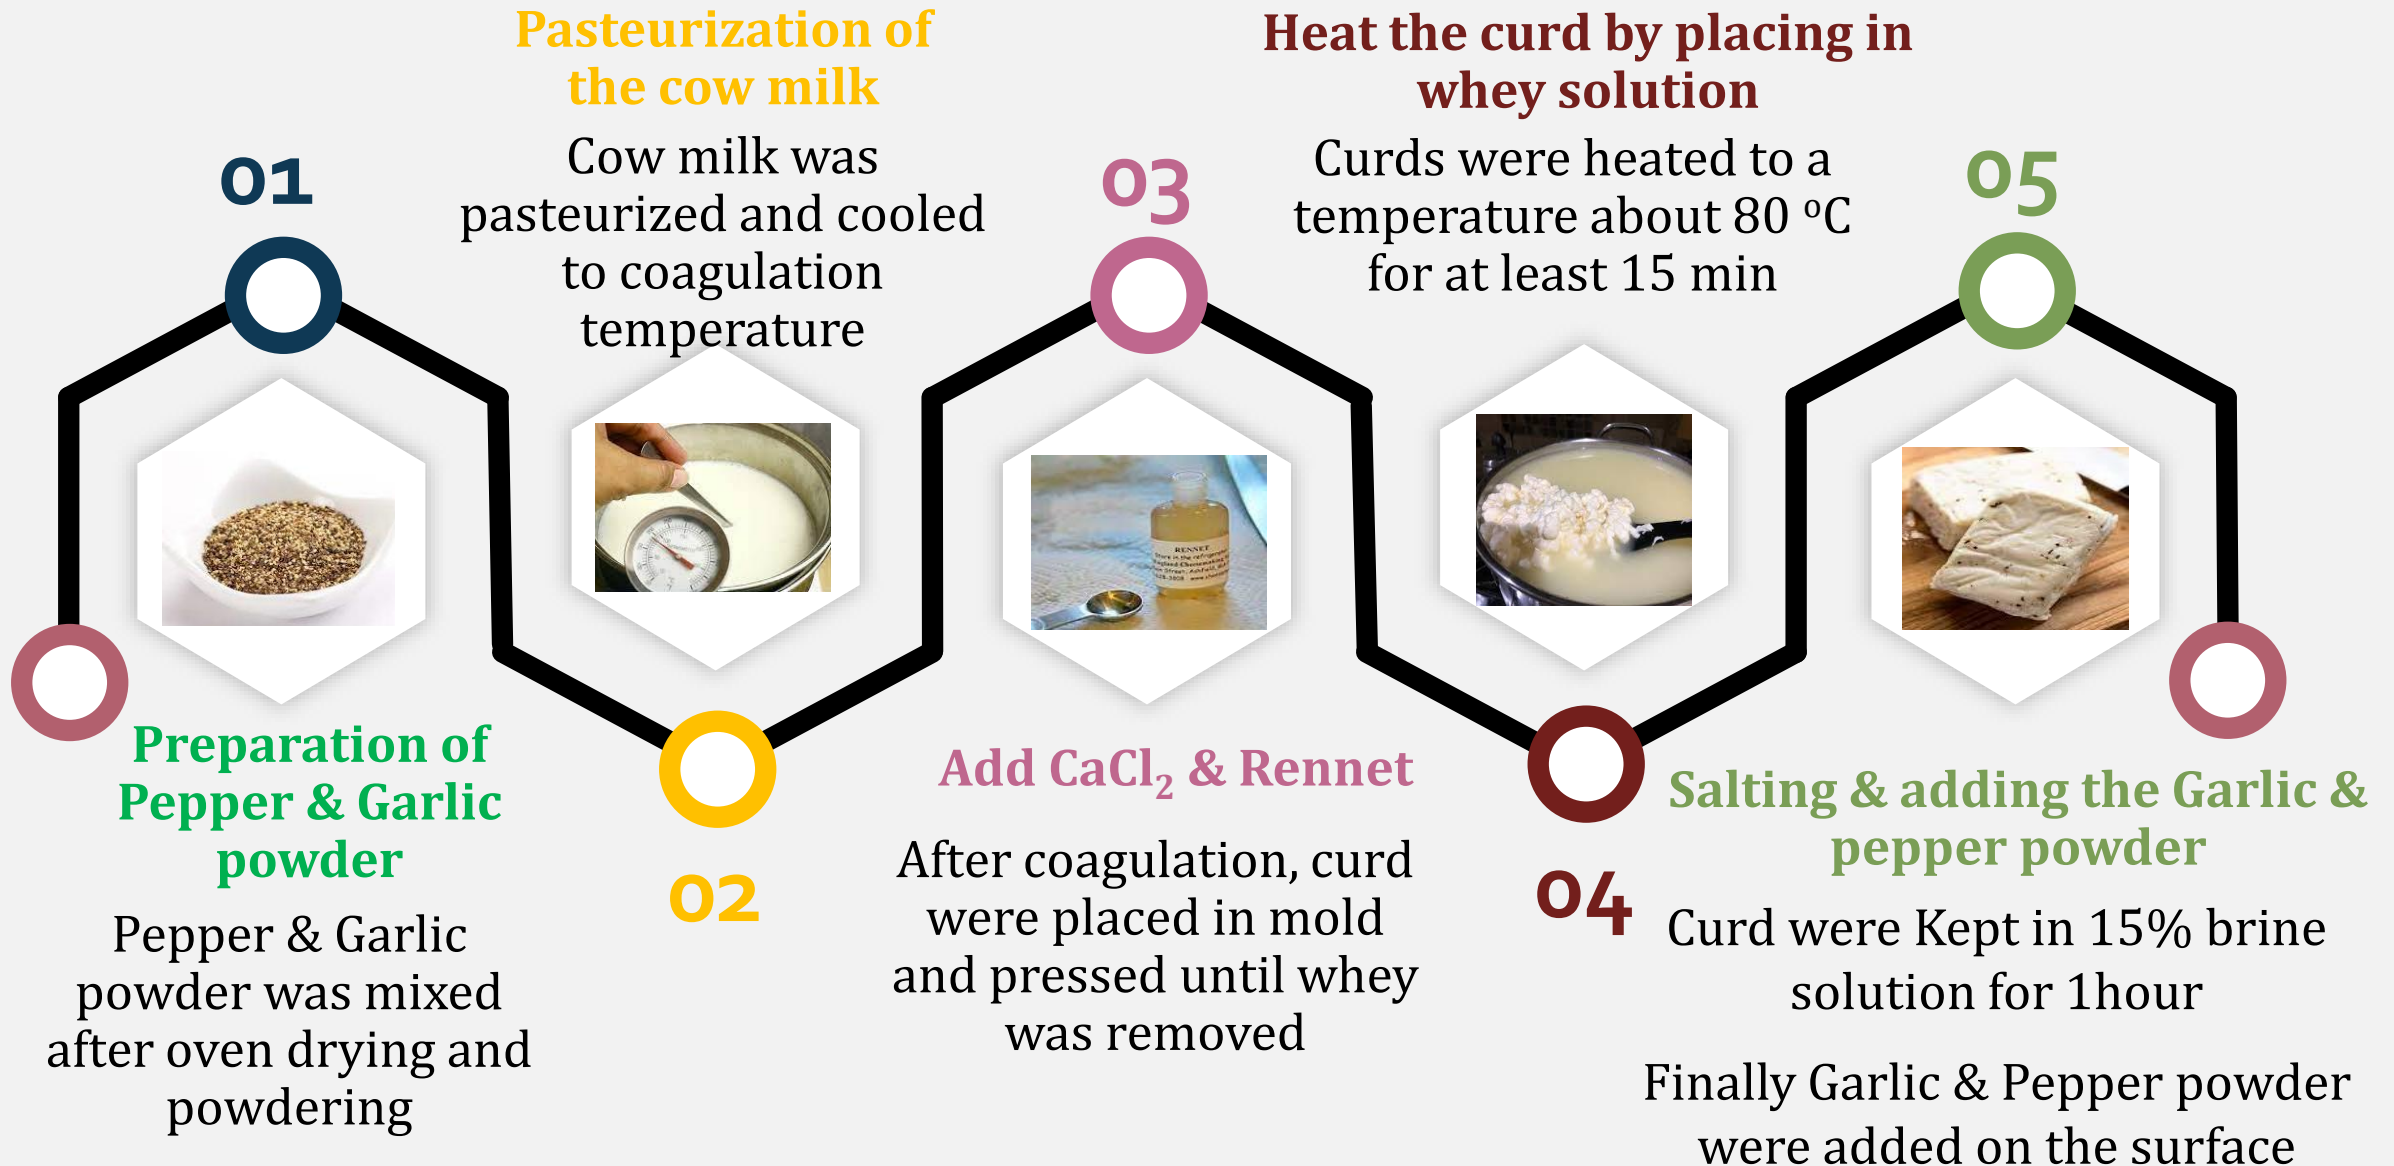

# Physicochemical Analysis

**Table 1:** Measured Physicochemical Parameters & Methods

| <b>Parameter</b>           | <b>Method</b>                         |
|----------------------------|---------------------------------------|
| Total solid (%)            | Oven Dry ( 105 <sup>0</sup> C, 16hrs) |
| Protein (%)                | Kjeldahl                              |
| Fat (%)                    | Soxhelt                               |
| Moisture (%)               | Oven Dry (105 <sup>0</sup> C, 3hrs)   |
| Ash (%)                    | Muffle Furner                         |
| pH                         | pH Meter                              |
| <b>Textural properties</b> |                                       |
| Cohesiveness               | TX 700 Texture<br>Analyzer            |
| Hardness                   |                                       |
| Chewiness                  |                                       |
| Gumminess                  |                                       |
| <b>Color parameters</b>    |                                       |
| L value, a value, b value  | Hunter Lab colour Meter               |

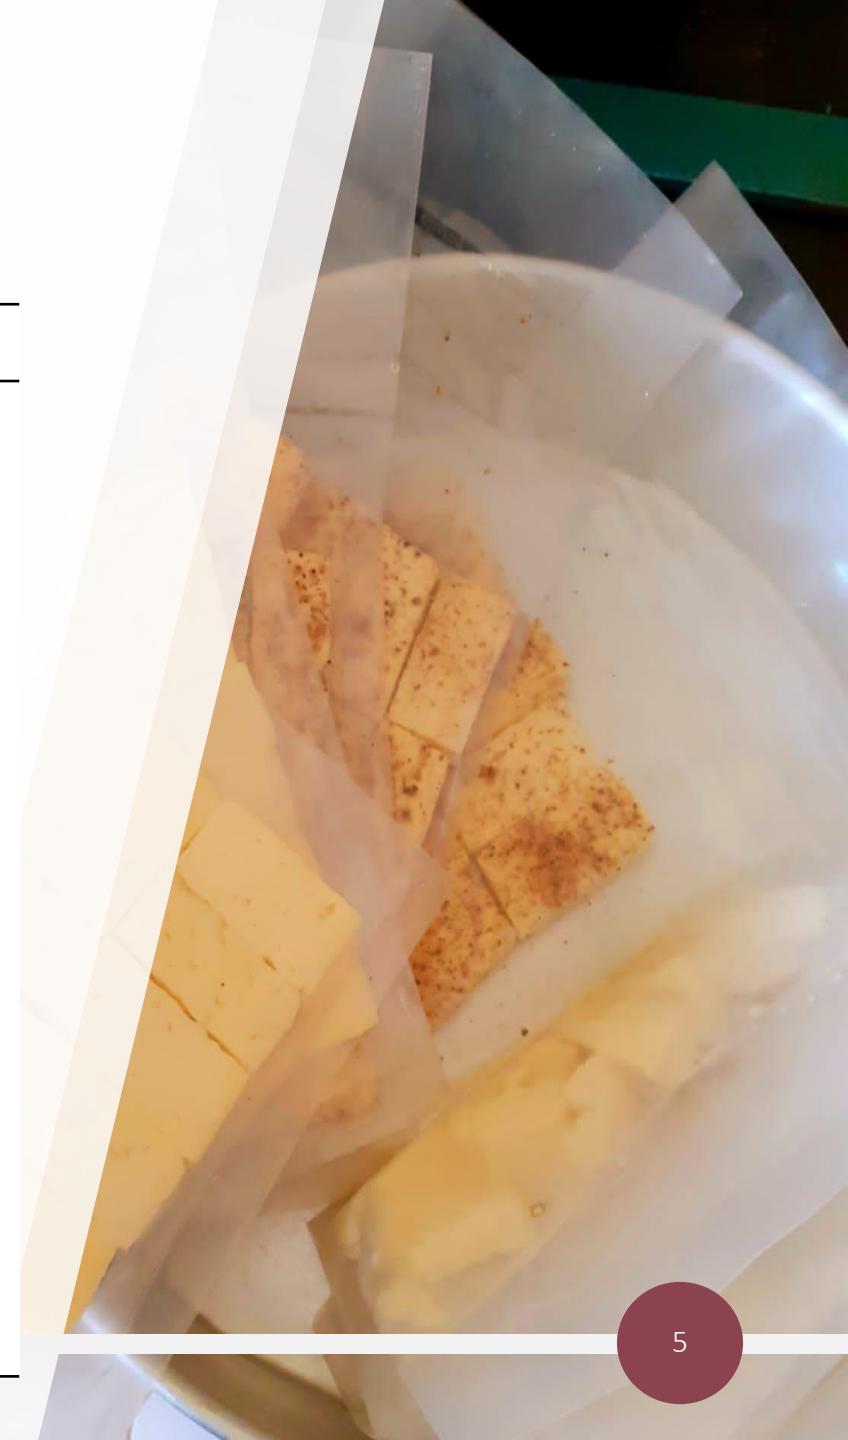

# Microbiological Analysis

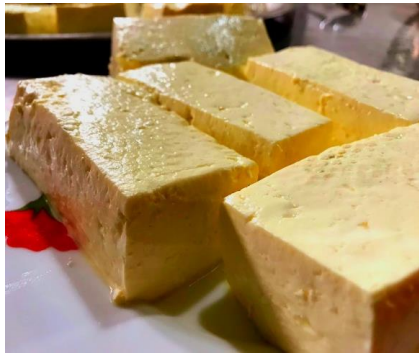

1. Halloumi cheese sample preparation

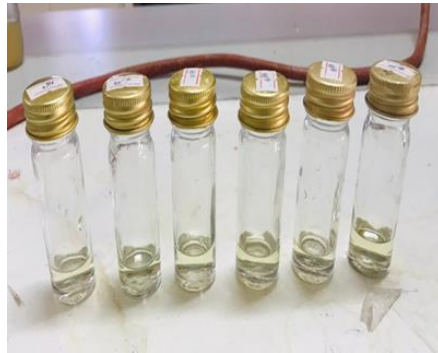

2. Serial dilution

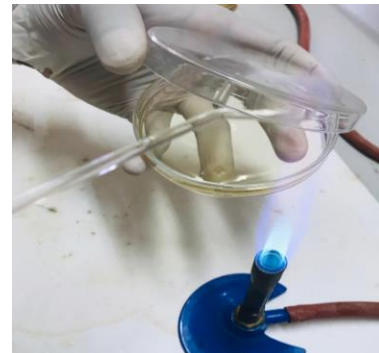

3. Microbiological examination

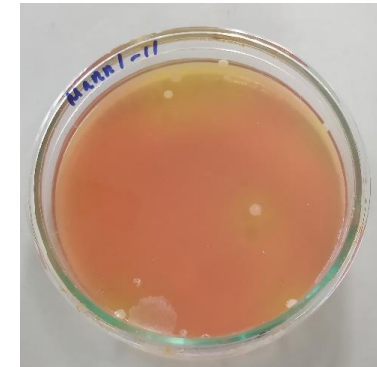

4. Determination of the shelf life of the sample

# Sensory Evaluation

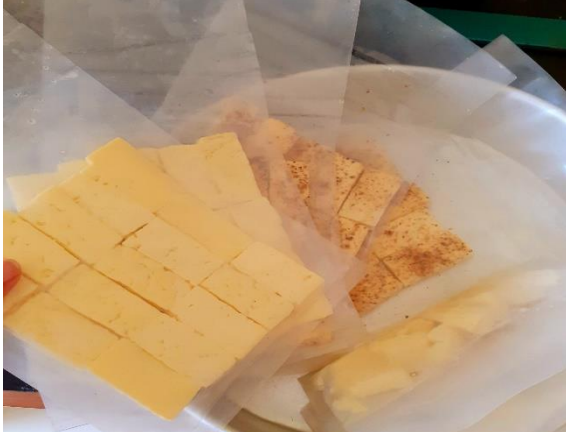

- Control Sample (nonfortified sample)
- Fortified Sample (with a mixture of garlic & pepper powder)

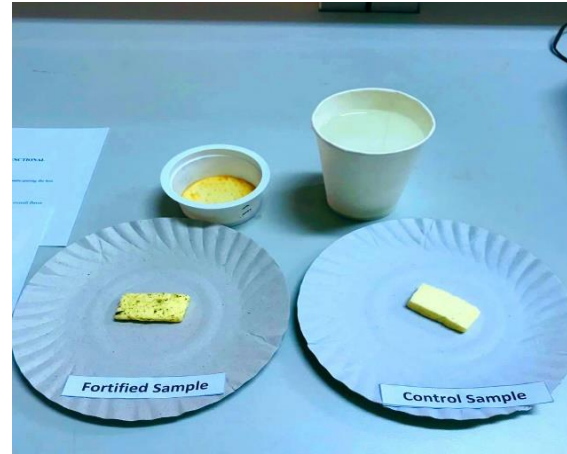

- 30 participants
- 20-30 years old

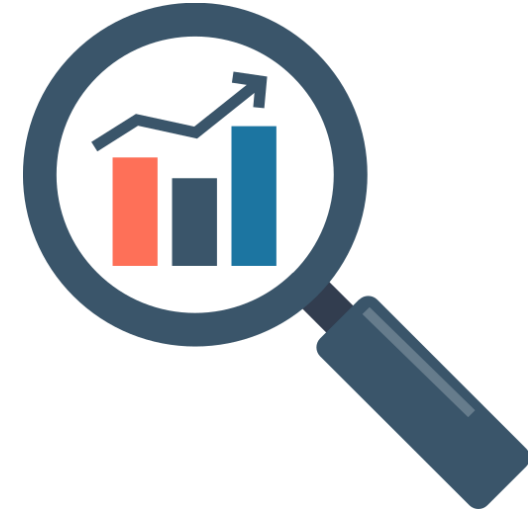

- XL STAT
- SPSS Software

# Results and Discussion

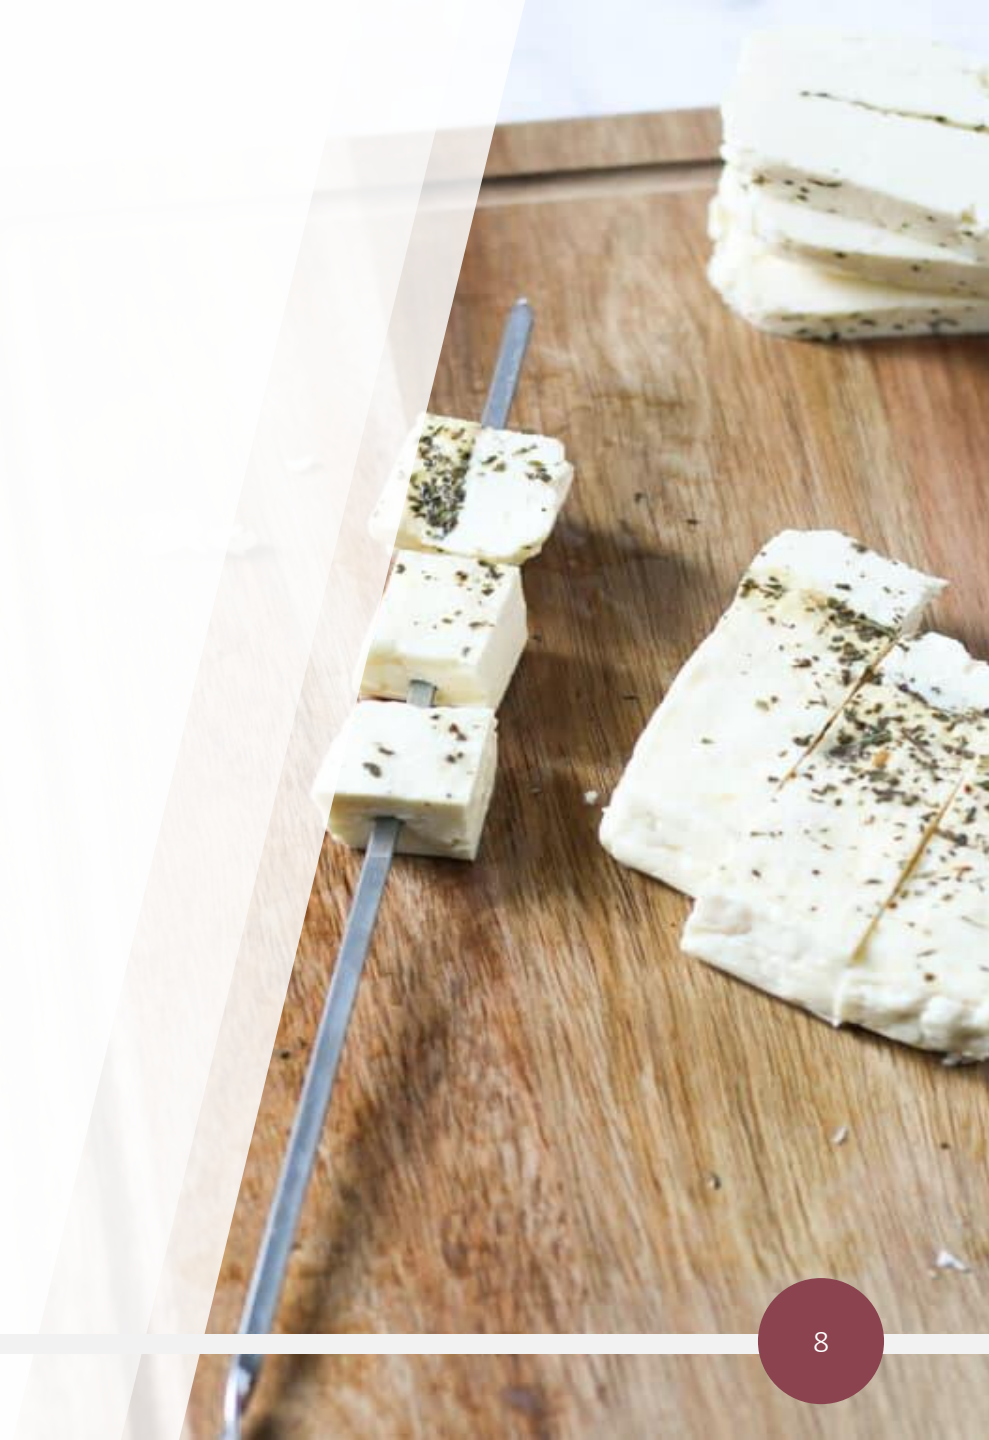



# Physicochemical Analysis

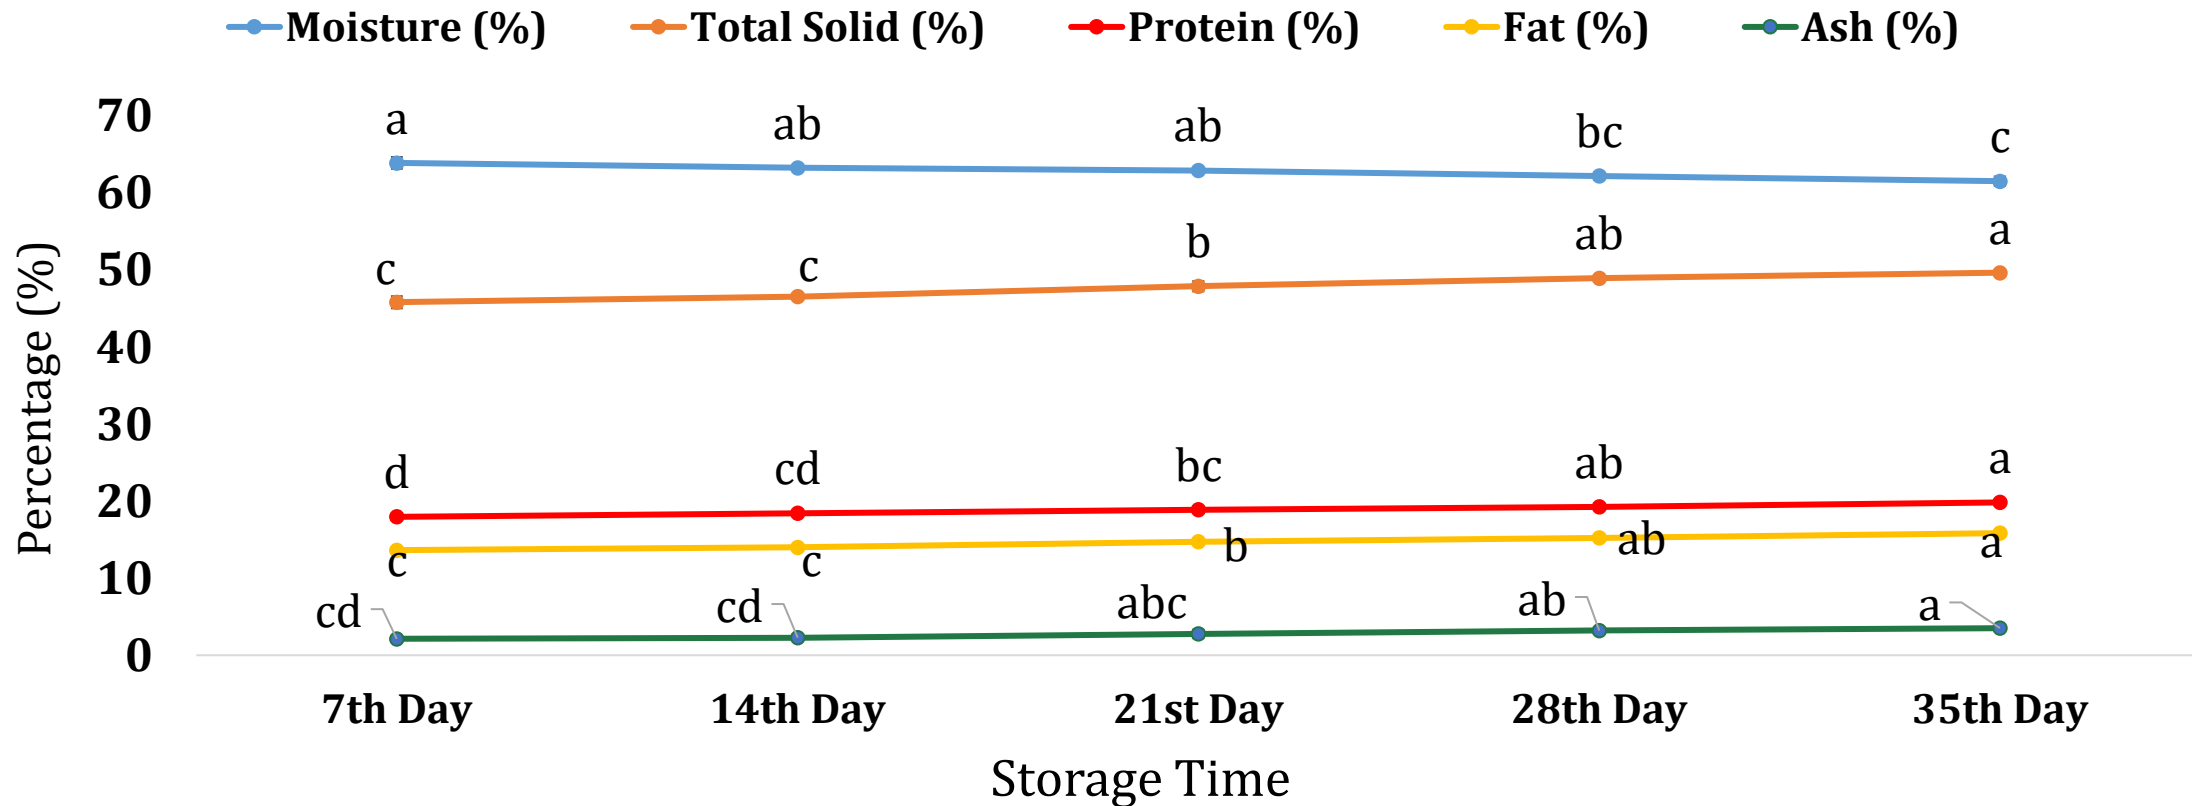

**Figure 1.** Chemical composition of Halloumi Cheese during the storage time

- There was a significant different ( $p < 0.05$ ) for moisture, total solid, protein, fat, ash content between the cheese samples with storage time.

# Physicochemical Analysis Con.

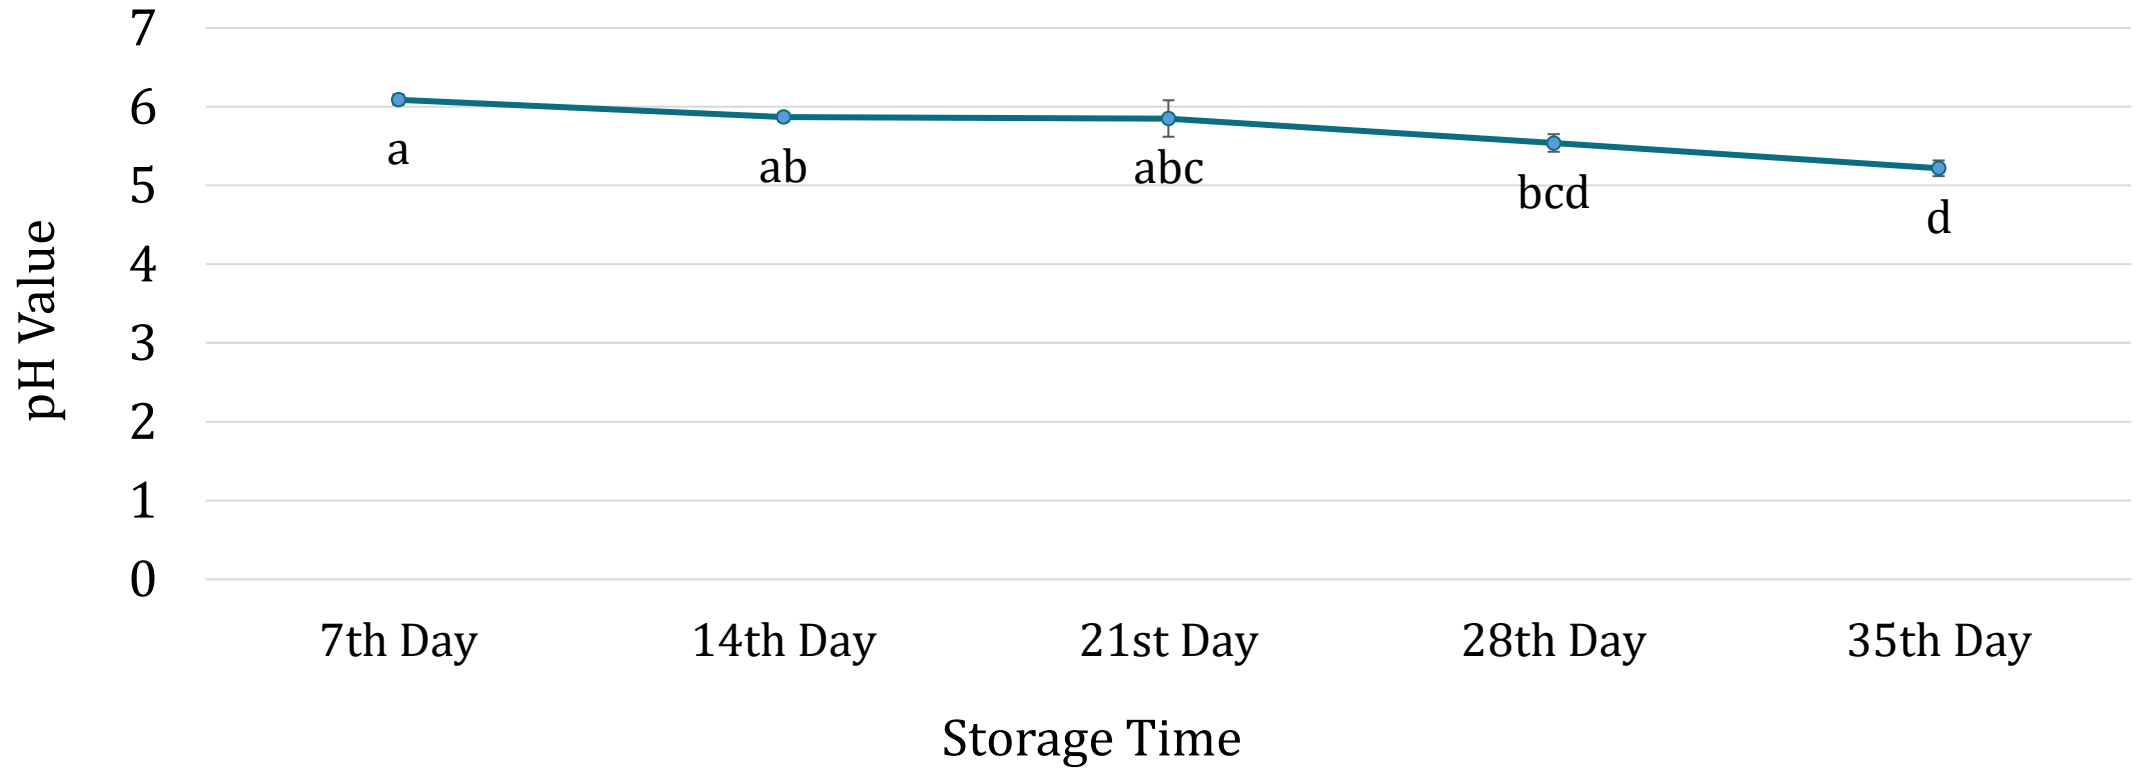

**Figure 2.** pH value of Halloumi Cheese during the storage time

- There was a significant different ( $p < 0.05$ ) for pH value between the cheese samples with storage time.

# Texture Profile Analysis

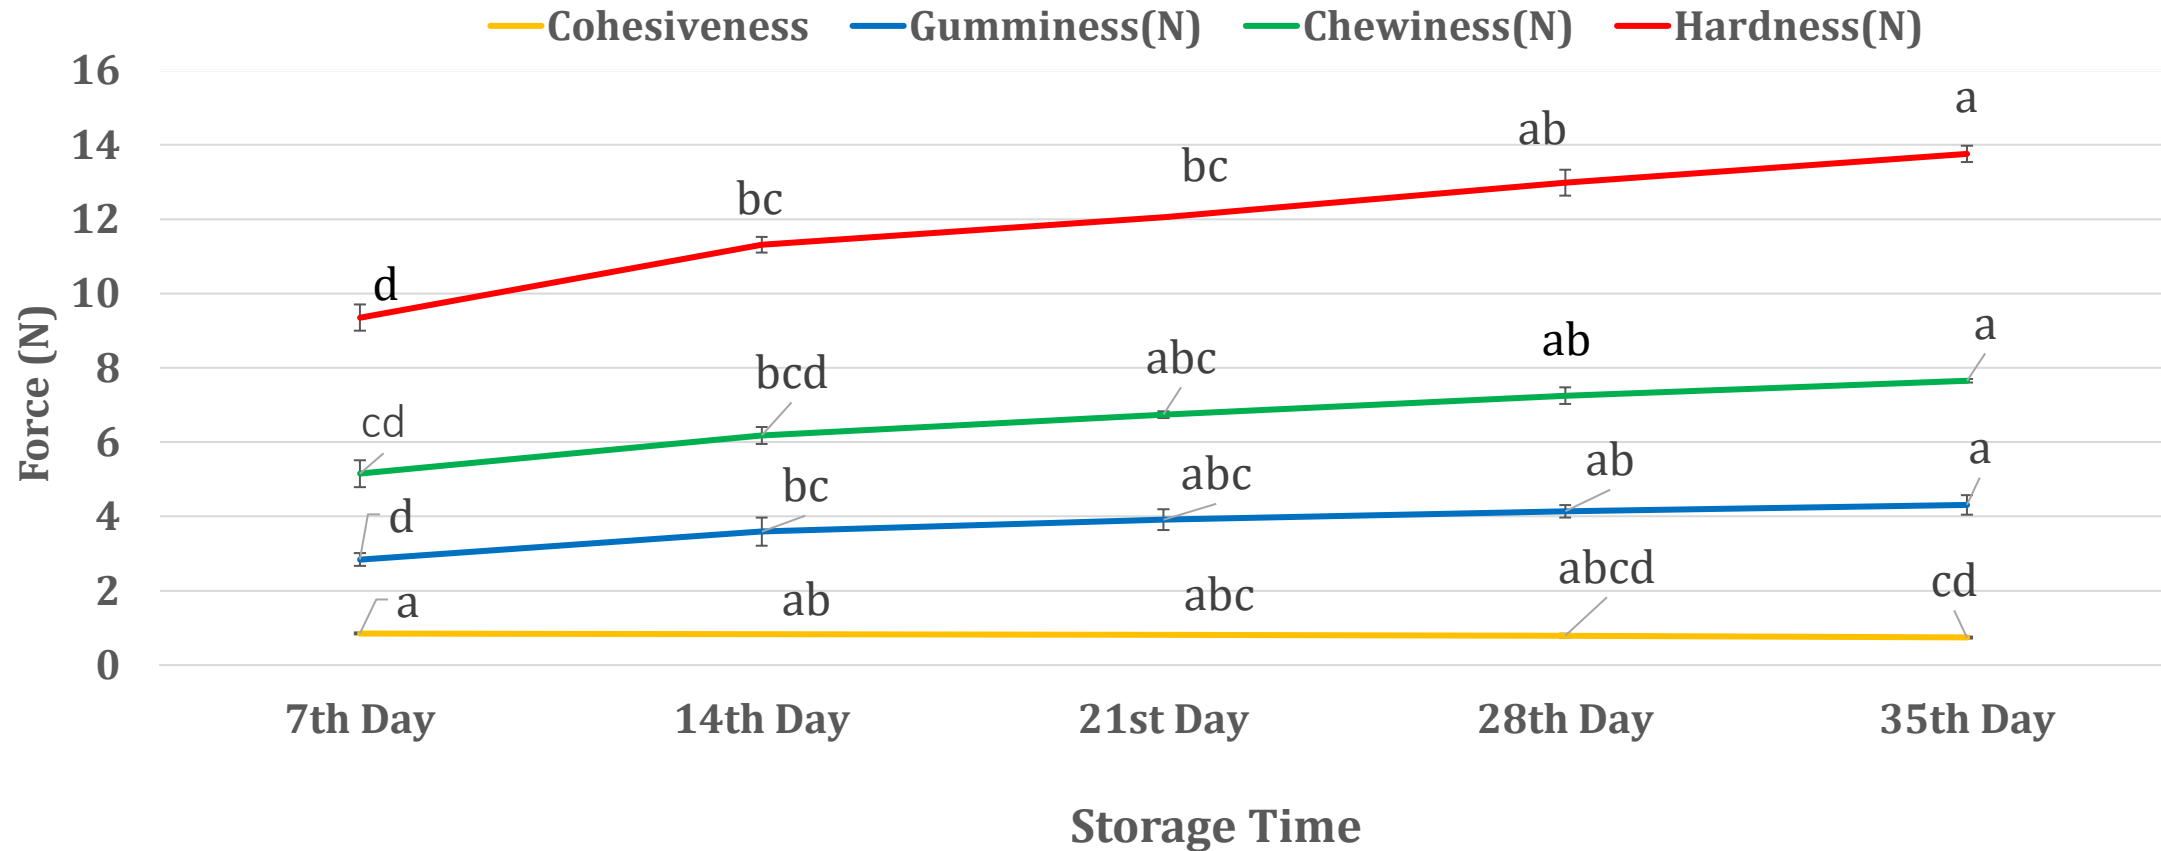

**Figure 3.** Texture Profile Analysis of Halloumi Cheese during the storage time

- There was a significant different ( $p < 0.05$ ) for Hardness, Chewiness, Gumminess, Cohesiveness between the cheese samples with storage time.

# Colour Analysis

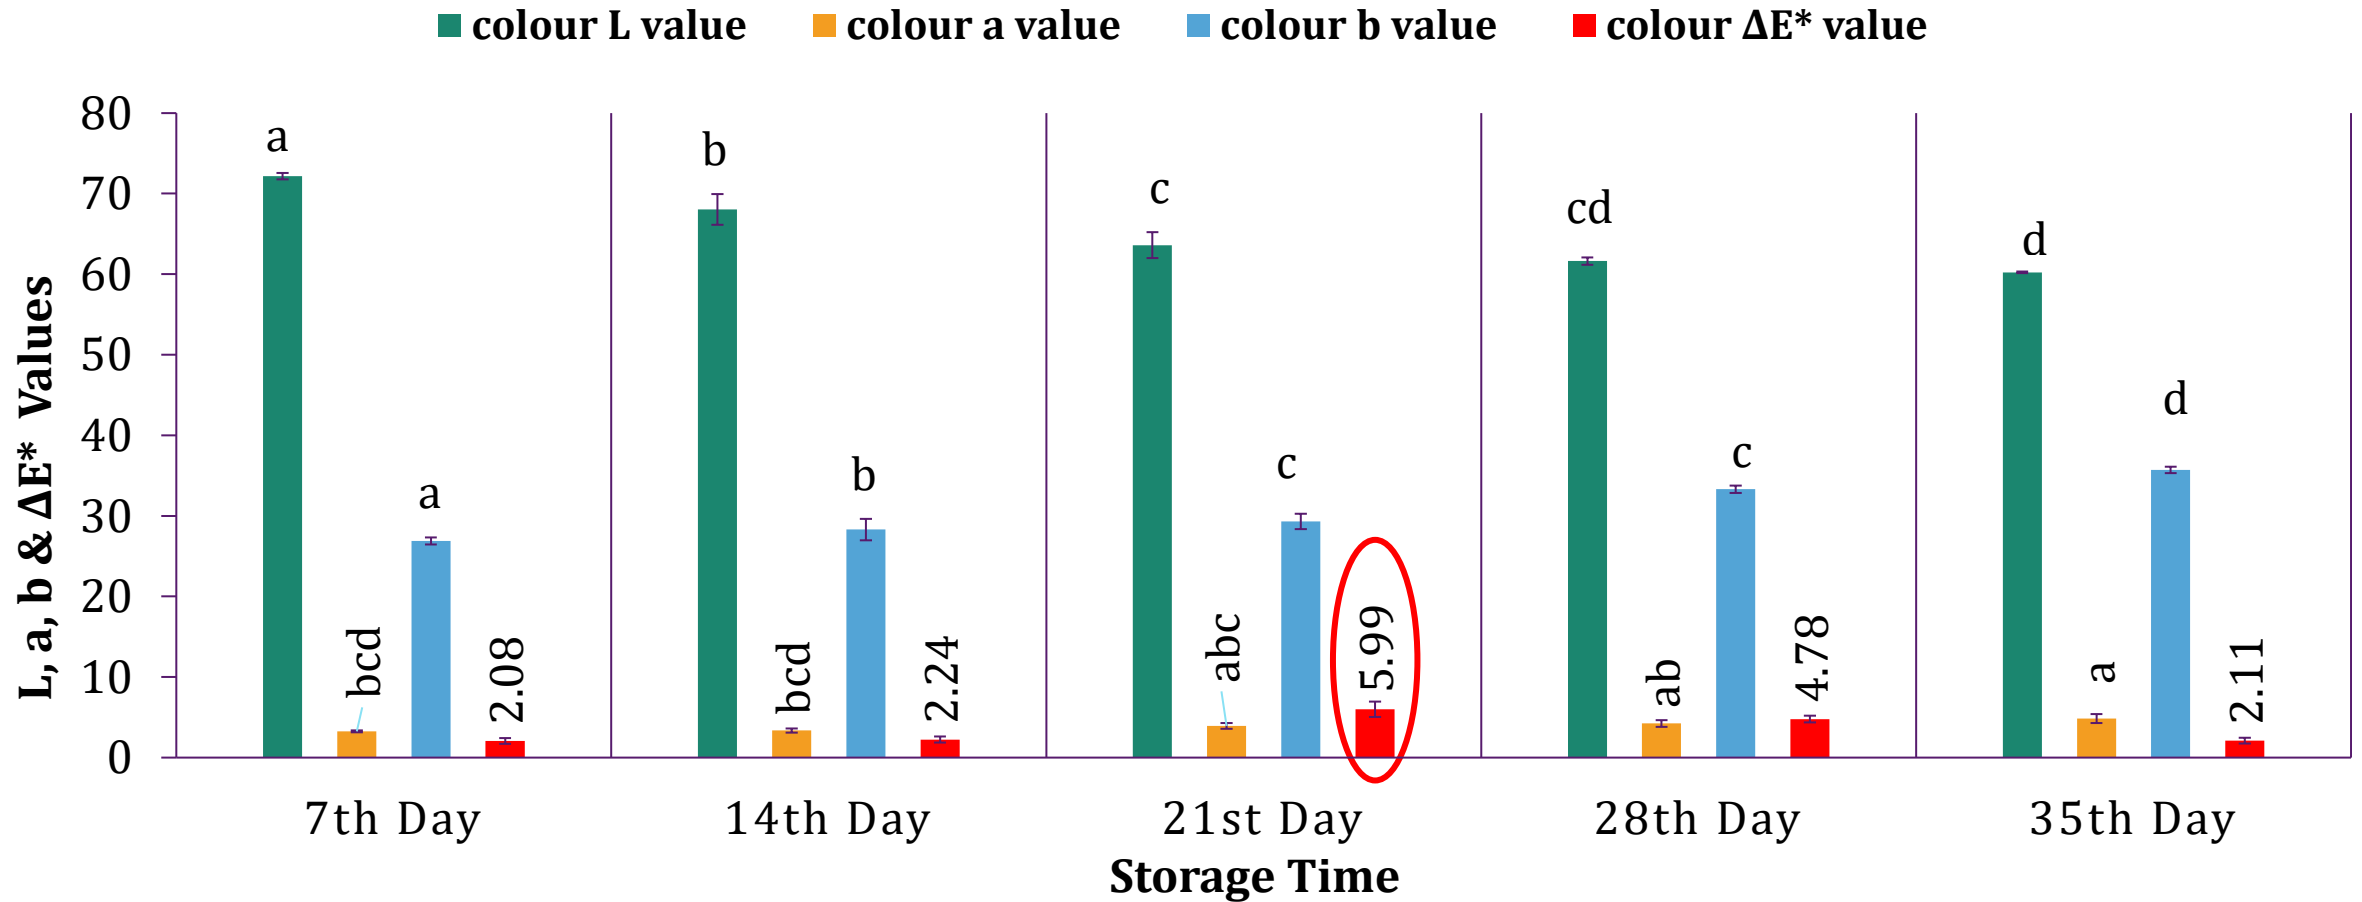

**Figure 4.** Colour characteristics of Halloumi Cheese during the storage period

- There was a significant different ( $p < 0.05$ ) for L value, a value, b value between the cheese samples with storage time.

# Microbiological Analysis

## Total bacteria count

**Table 2:** Microbial count of total bacteria during storage time

| Storage time (Days) | Microbial count of total bacteria (log CFU/g) |
|---------------------|-----------------------------------------------|
| 1                   | 2.51±0.03 <sup>d</sup>                        |
| 10                  | 2.71±0.09 <sup>c</sup>                        |
| 20                  | 2.70±0.02 <sup>c</sup>                        |
| 30                  | 3.77±0.05 <sup>b</sup>                        |
| 40                  | 4.78±0.02 <sup>a</sup>                        |

Values followed by different superscript letters indicate significant differences; tukey's test ( $P < 0.05$ )

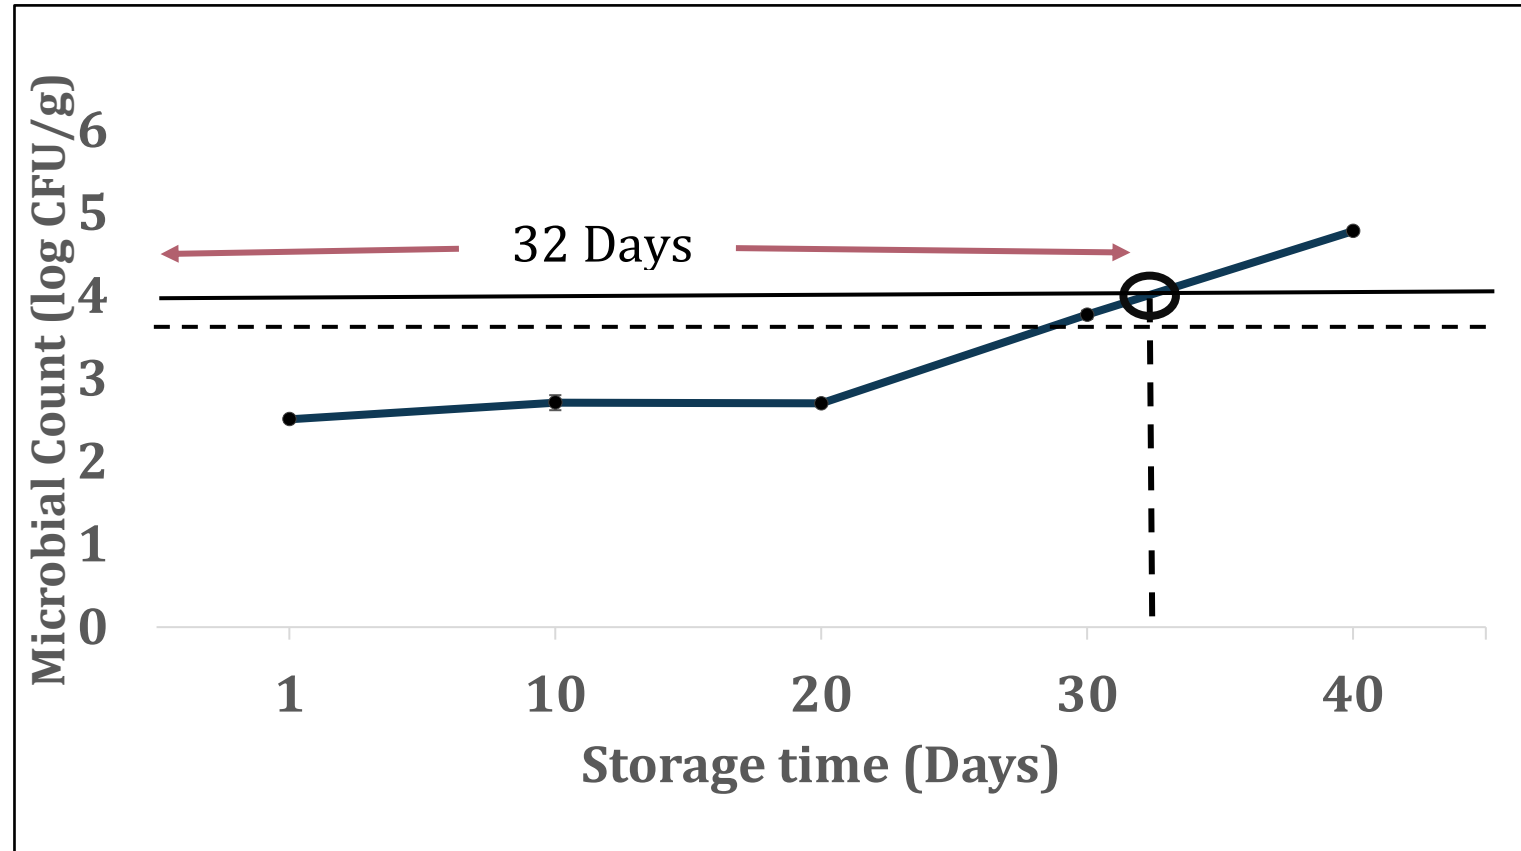

**Figure 5.** Growth curve of total bacteria during storage time

- Maximum permissible limit of total bacteria
- - - - Minimum permissible limit of total bacteria
- Total bacteria count of current study

## *E. coli* count

**Table 3:** Microbial count of *E. coli* during storage time

| Storage time (Days) | Microbial count of <i>E. coli</i> (log CFU/g) |
|---------------------|-----------------------------------------------|
| 1                   | 0.00±0.00 <sup>d</sup>                        |
| 10                  | 1.00±0.00 <sup>c</sup>                        |
| 20                  | 1.20±0.17 <sup>c</sup>                        |
| 30                  | 1.88±0.03 <sup>b</sup>                        |
| 40                  | 2.16±0.02 <sup>a</sup>                        |

Values followed by different superscript letters indicate significant differences; tukey's test ( $P < 0.05$ )

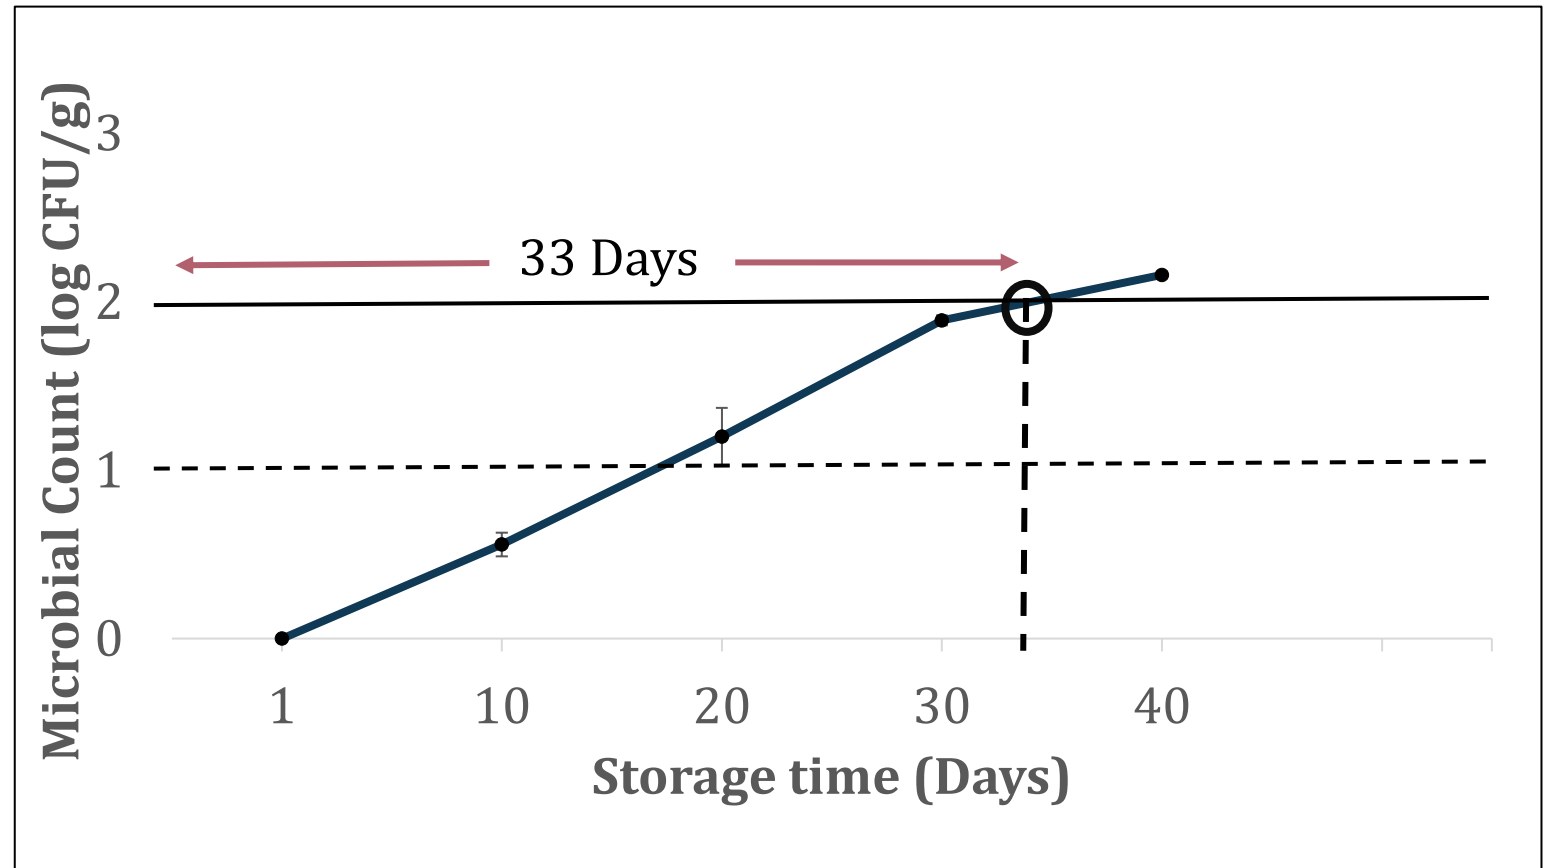

**Figure 6.** Growth curve of *E. coli* during storage time

- Maximum permissible limit of *E. coli*
- - - - Minimum permissible limit of *E. coli*
- *E. coli* count of current study

# Yeasts and molds count

**Table 4:** Microbial count of yeasts & molds during storage time

| Storage time (Days) | Microbial count of yeasts & molds (log CFU/g) |
|---------------------|-----------------------------------------------|
| 1                   | 0.00±0.00 <sup>e</sup>                        |
| 10                  | 1.10±0.17 <sup>d</sup>                        |
| 20                  | 1.42±0.10 <sup>c</sup>                        |
| 30                  | 1.92±0.08 <sup>b</sup>                        |
| 40                  | 2.30±0.04 <sup>a</sup>                        |

Values followed by different superscript letters indicate significant differences; tukey's test ( $P < 0.05$ )

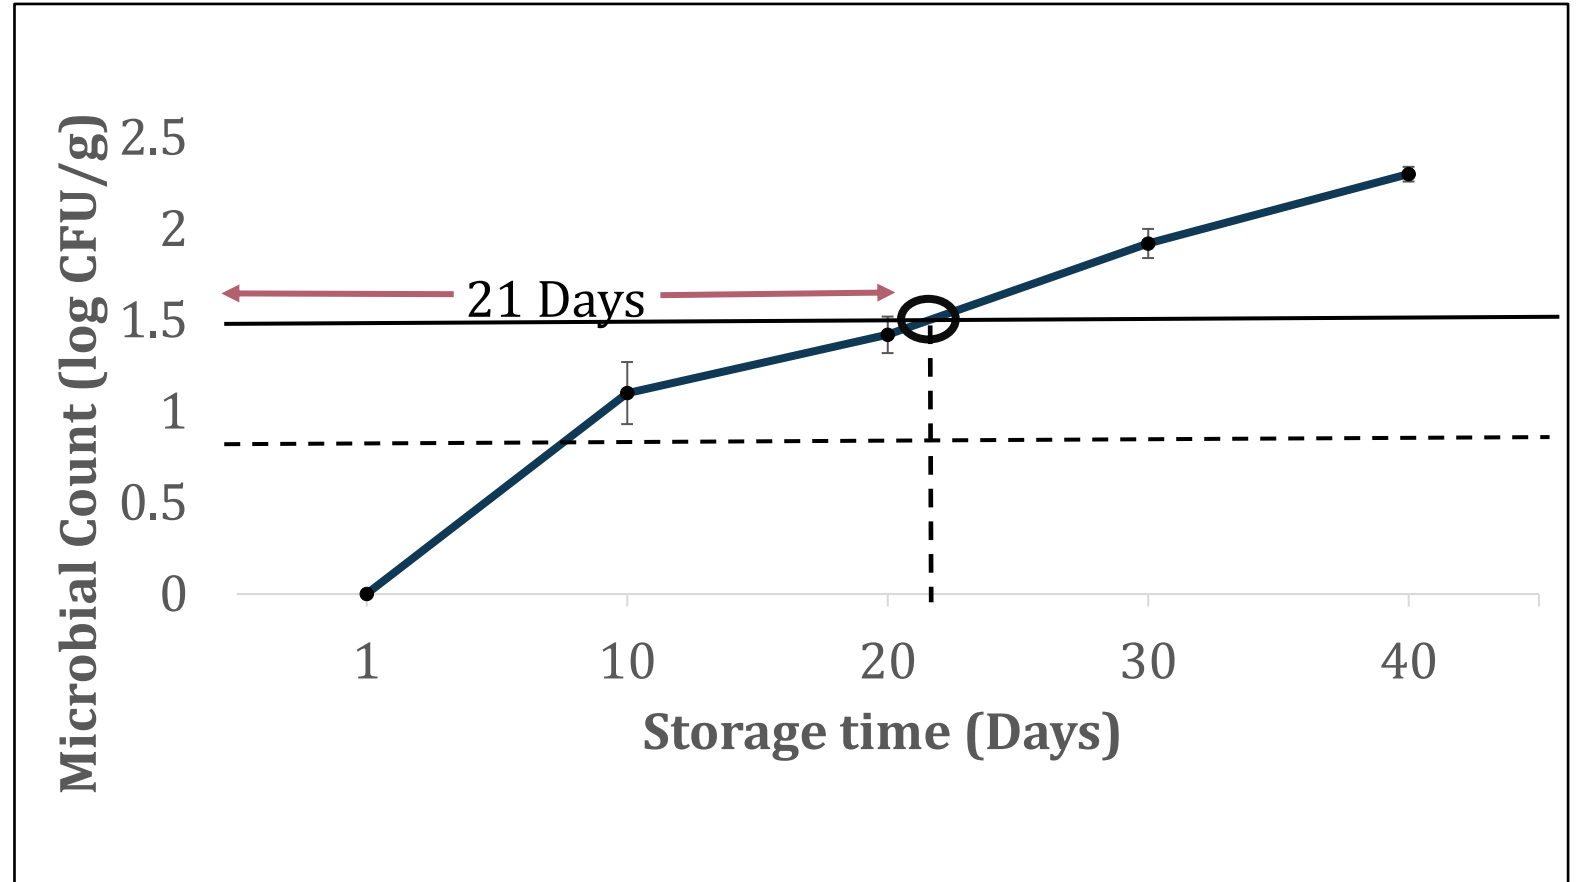

**Figure 7.** Growth curve of yeasts and molds during storage time

- Maximum permissible limit of yeasts and molds
- - - Minimum permissible limit of yeasts and molds
- Yeasts and molds count of current study

## *S. aureus* count

**Table 5:** Microbial count of *S. aureus* during storage time

| Storage time (Days) | Microbial count of <i>S. aureus</i> (log CFU/g) |
|---------------------|-------------------------------------------------|
| 1                   | 1.92±0.03 <sup>a</sup>                          |
| 10                  | 1.63±0.13 <sup>b</sup>                          |
| 20                  | 1.59±0.11 <sup>bc</sup>                         |
| 30                  | 1.59±0.11 <sup>bcd</sup>                        |
| 40                  | 1.36±0.10 <sup>bcd</sup>                        |

Values followed by different superscript letters indicate significant differences; tukey's test ( $P < 0.05$ )

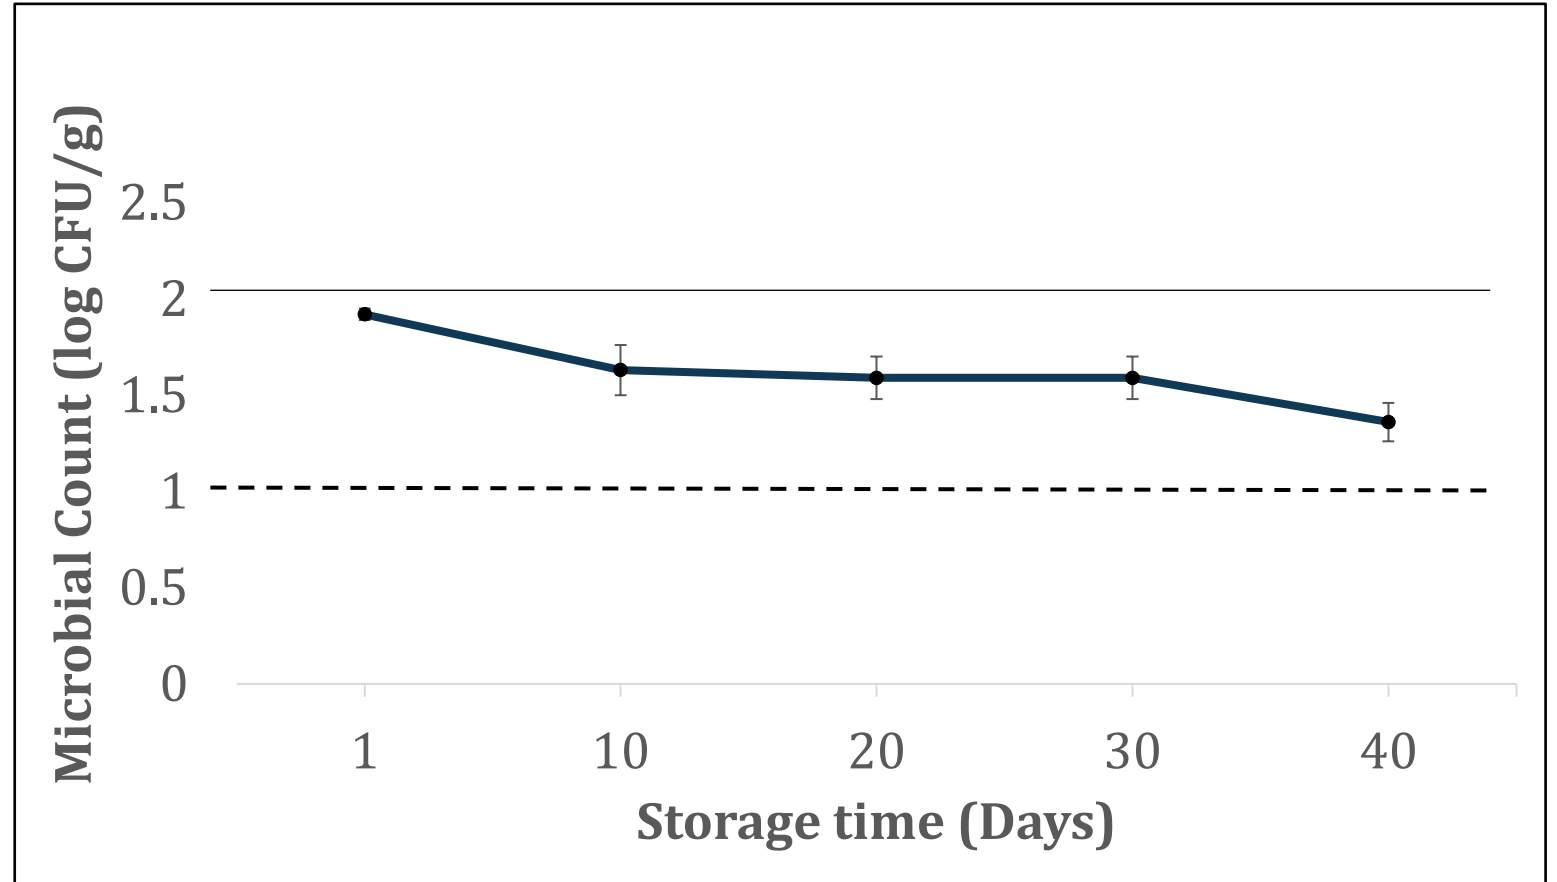

**Figure 8.** Growth curve of *S. aureus* during storage time

- Maximum permissible limit of *S. aureus*
- - - - Minimum permissible limit of *S. aureus*
- *S. aureus* count of current study



# LAB count

**Table 6:** Microbial count of LAB during storage time

| Storage time (Days) | Microbial count of LAB (log CFU/g) |
|---------------------|------------------------------------|
| 1                   | 0.00±0.00 <sup>d</sup>             |
| 10                  | 2.49±0.01 <sup>c</sup>             |
| 20                  | 2.53±0.01 <sup>c</sup>             |
| 30                  | 2.68±0.02 <sup>a</sup>             |
| 40                  | 2.62±0.02 <sup>b</sup>             |

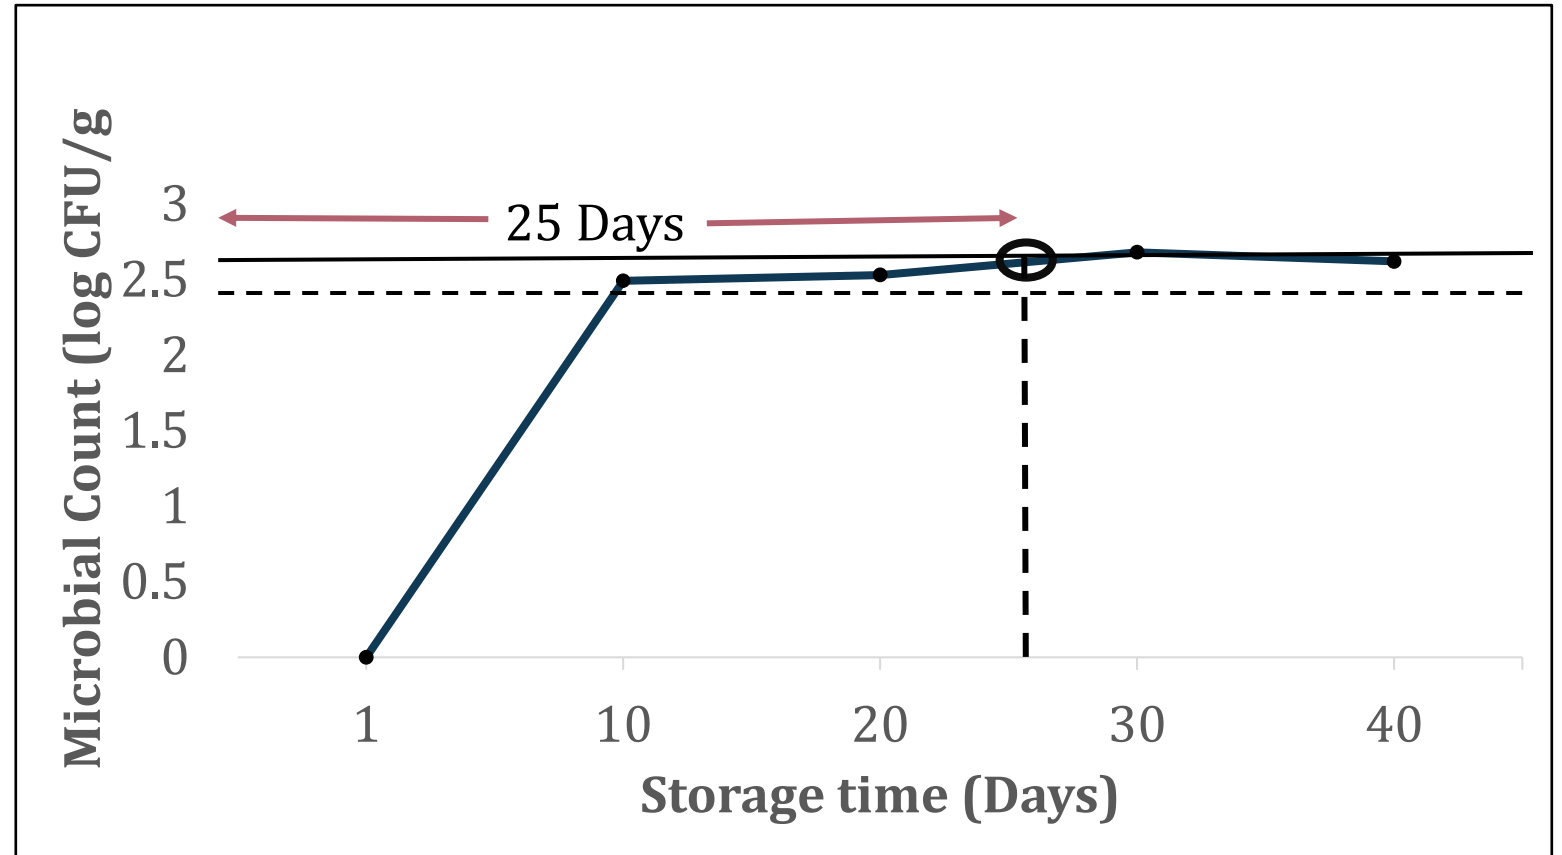

**Figure 9.** Growth curve of LAB during storage time

- Maximum permissible limit of LAB
- - - Minimum permissible limit of LAB
- LAB count of current study

Values followed by different superscript letters indicate significant differences; tukey's test ( $P < 0.05$ )

# Sensory Analysis

## Liking scores

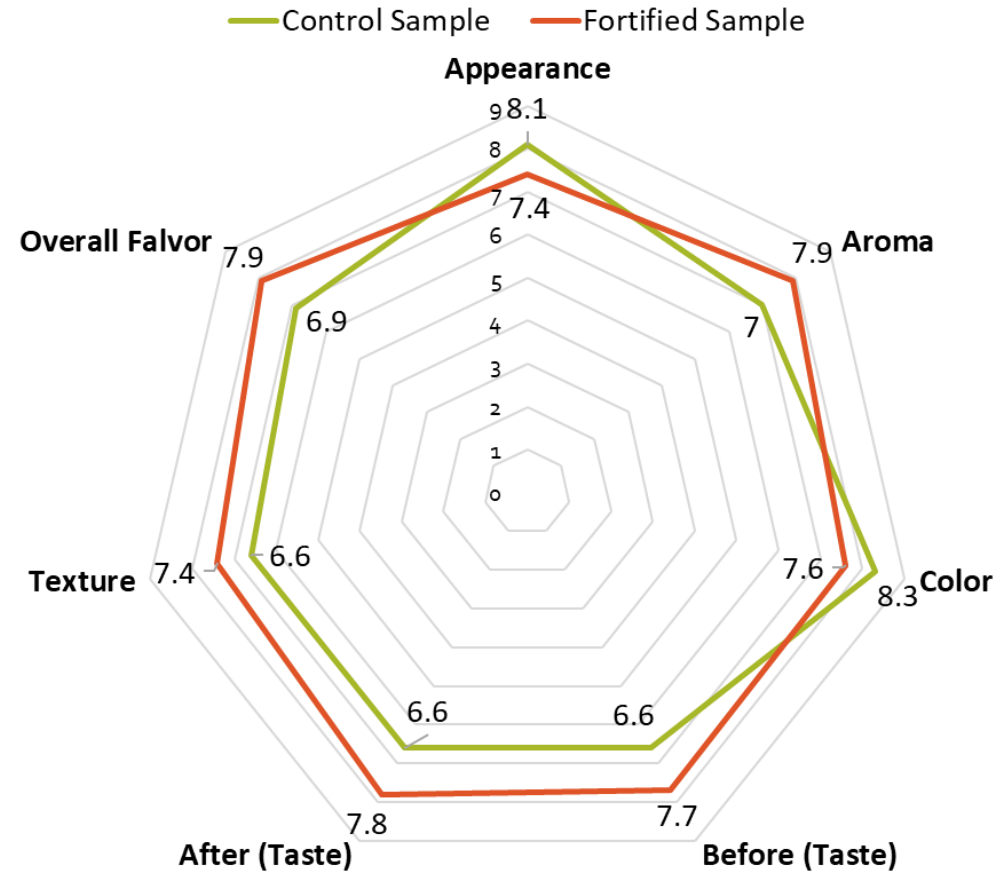

Figure 10. Spider chart for consumer preference mean scores.

# Conclusion

- pH value and moisture content of samples significantly declined and total solid, fat, protein and ash content were significantly increased with storage time.
- Lightness of samples ( $L^*$ ) significantly declined and yellow tone (parameter  $b^*$ ) and red tone ( $a^*$ ) were more pronounced during storage time.
- Cohesiveness of the sample significantly declined and Gumminess, Chewiness and Hardness were significantly increased with storage time.
- Microbiological Shelf life of Halloumi cheese – 21 days at 10°C
- Halloumi cheese fortified with garlic (*Allium sativum L*) & pepper (*Piper nigrum L*) powder mixture improve the consumer preference by aroma, taste, texture & overall flavor.

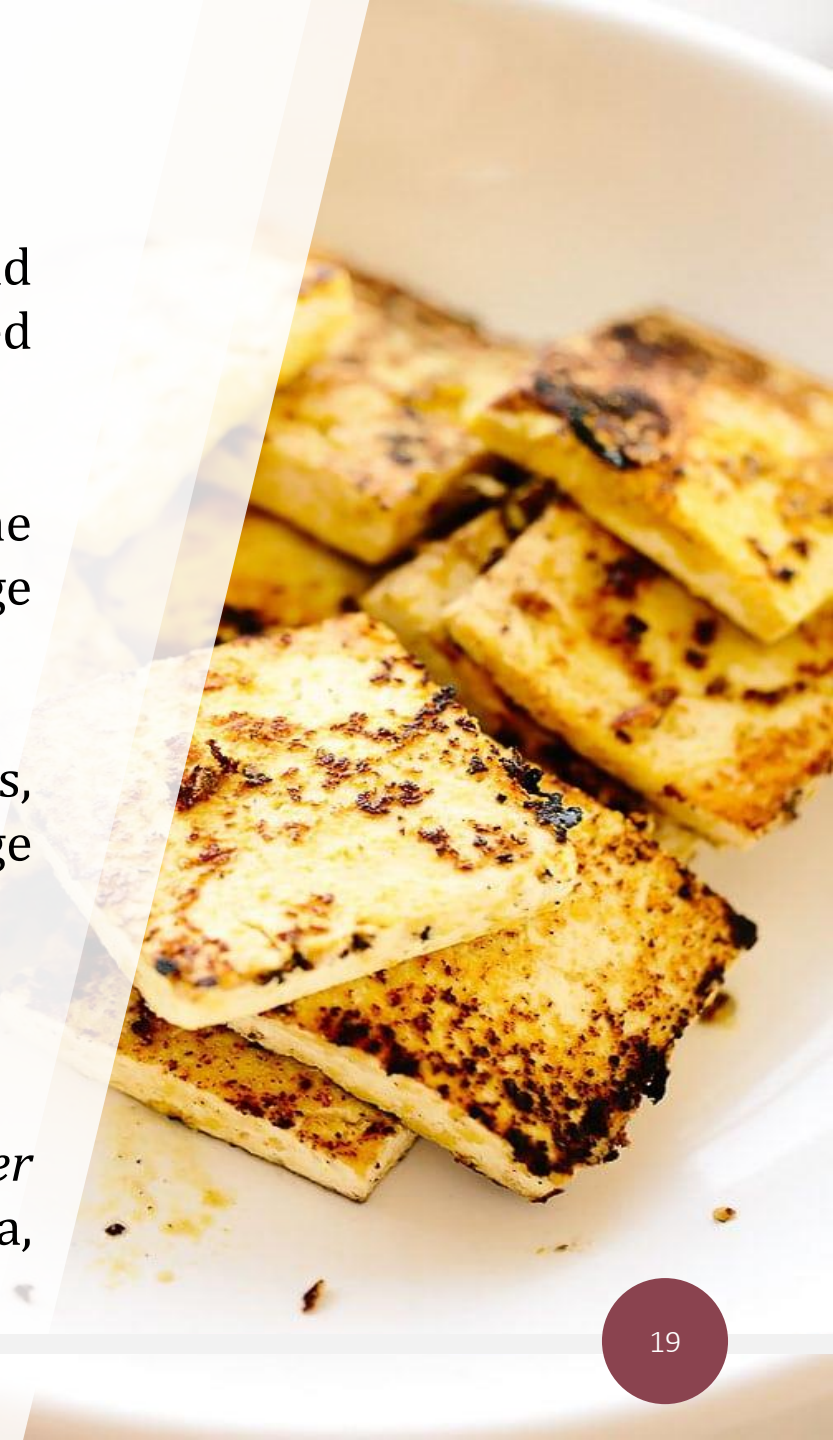

# References

- Atwaa, E.H., Ramadan, M.F. and Abd El-Sattar, E. (2020). Production of Functional Spreadable Processed Cheese Supplemented with Sweet Red Pepper Paste. *Journal of Food and Dairy Sciences*, [online] 11(5), pp.127–132. doi:10.21608/jfds.2020.102741.
- Mehyar, G.F. *et al.* (2017) 'Effects of chitosan coating containing lysozyme or natamycin on shelf-life , microbial quality , and sensory properties of Halloumi cheese brined in normal and reduced salt solutions', (January), pp. 1–9. Available at: <https://doi.org/10.1111/jfpp.13324>.
- Stone, H. and Sidel, J.L., 2004. Introduction to sensory evaluation. *Sensory Evaluation Practices (Third Edition)*. Academic Press, San Diego, pp.1-19.

THANK YOU

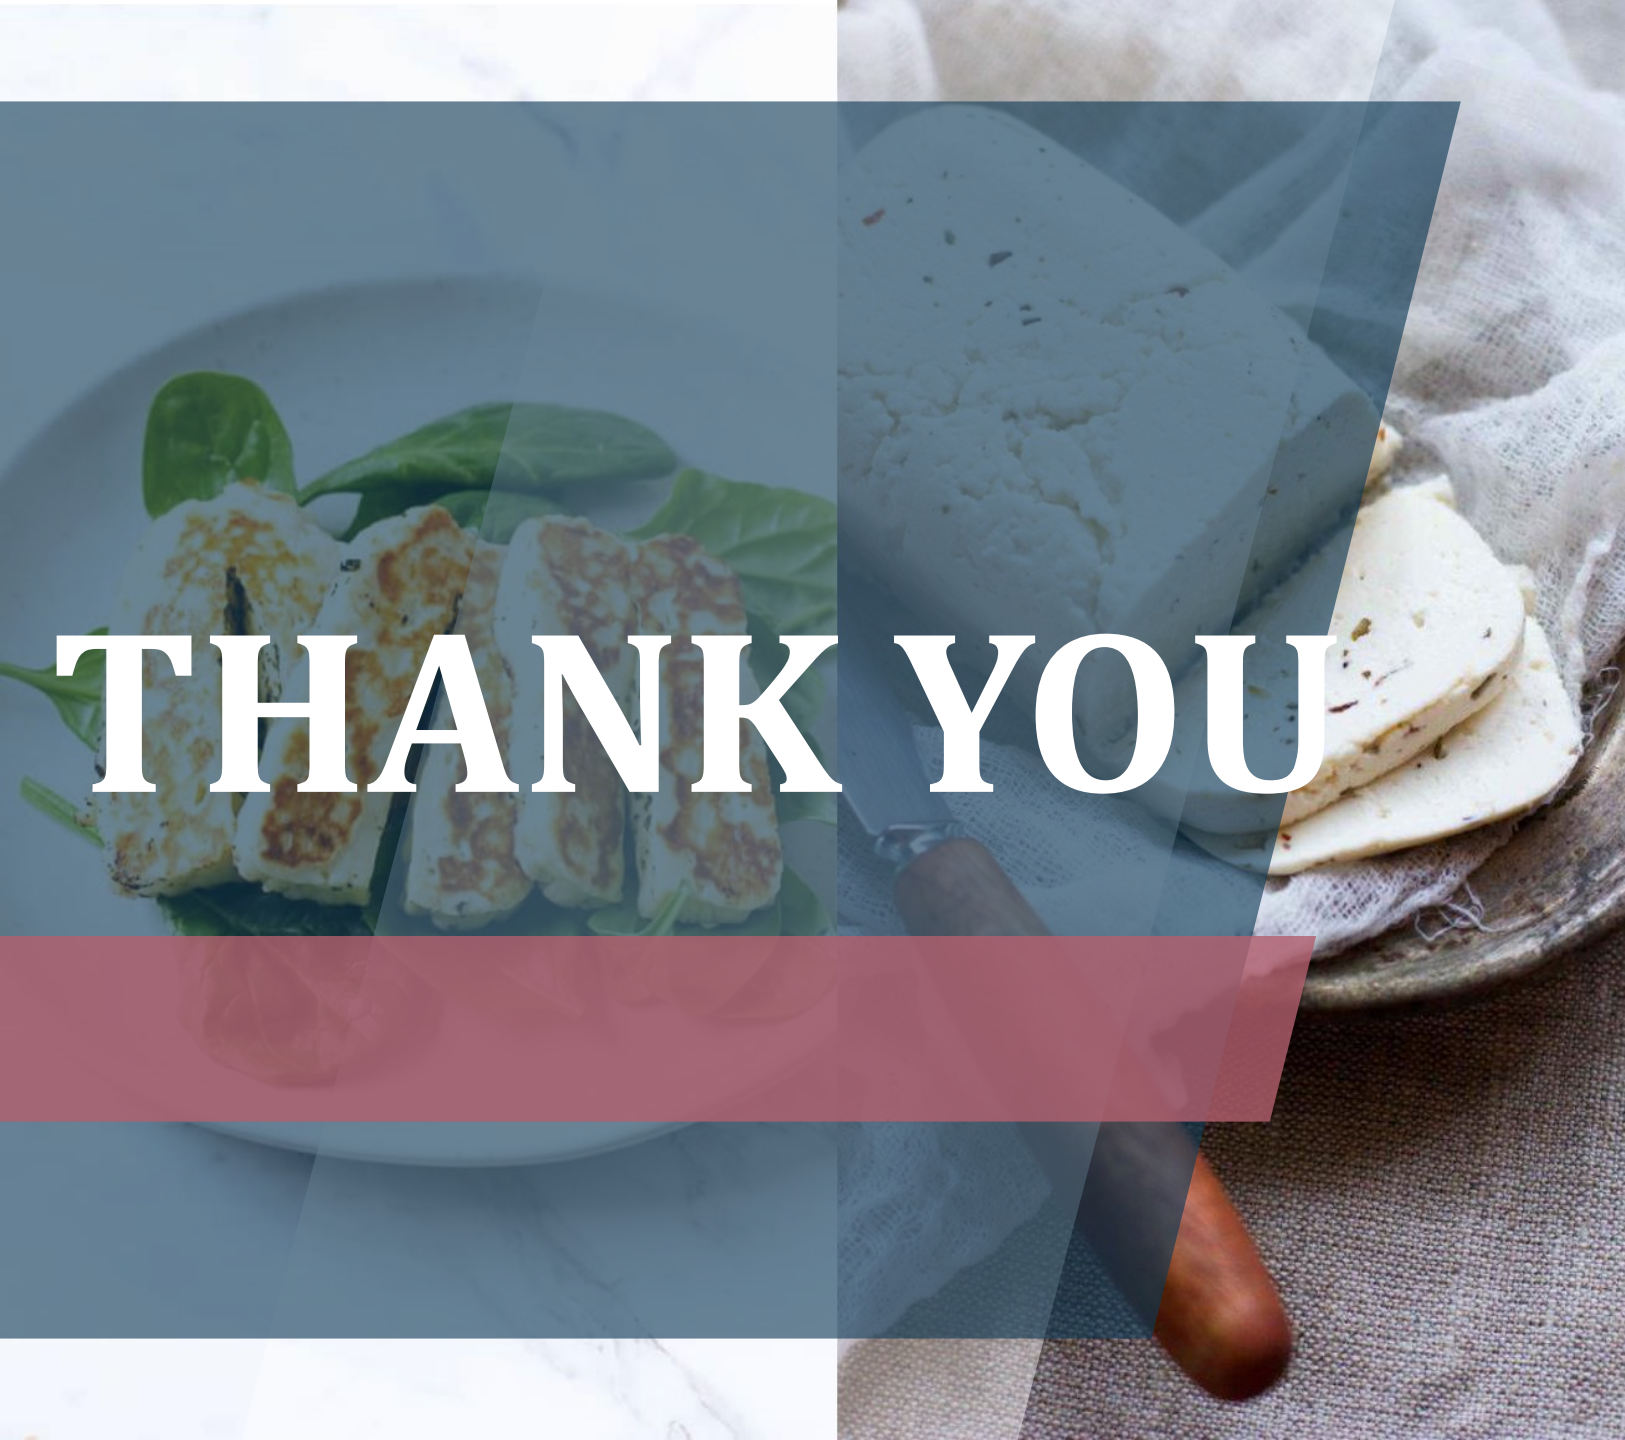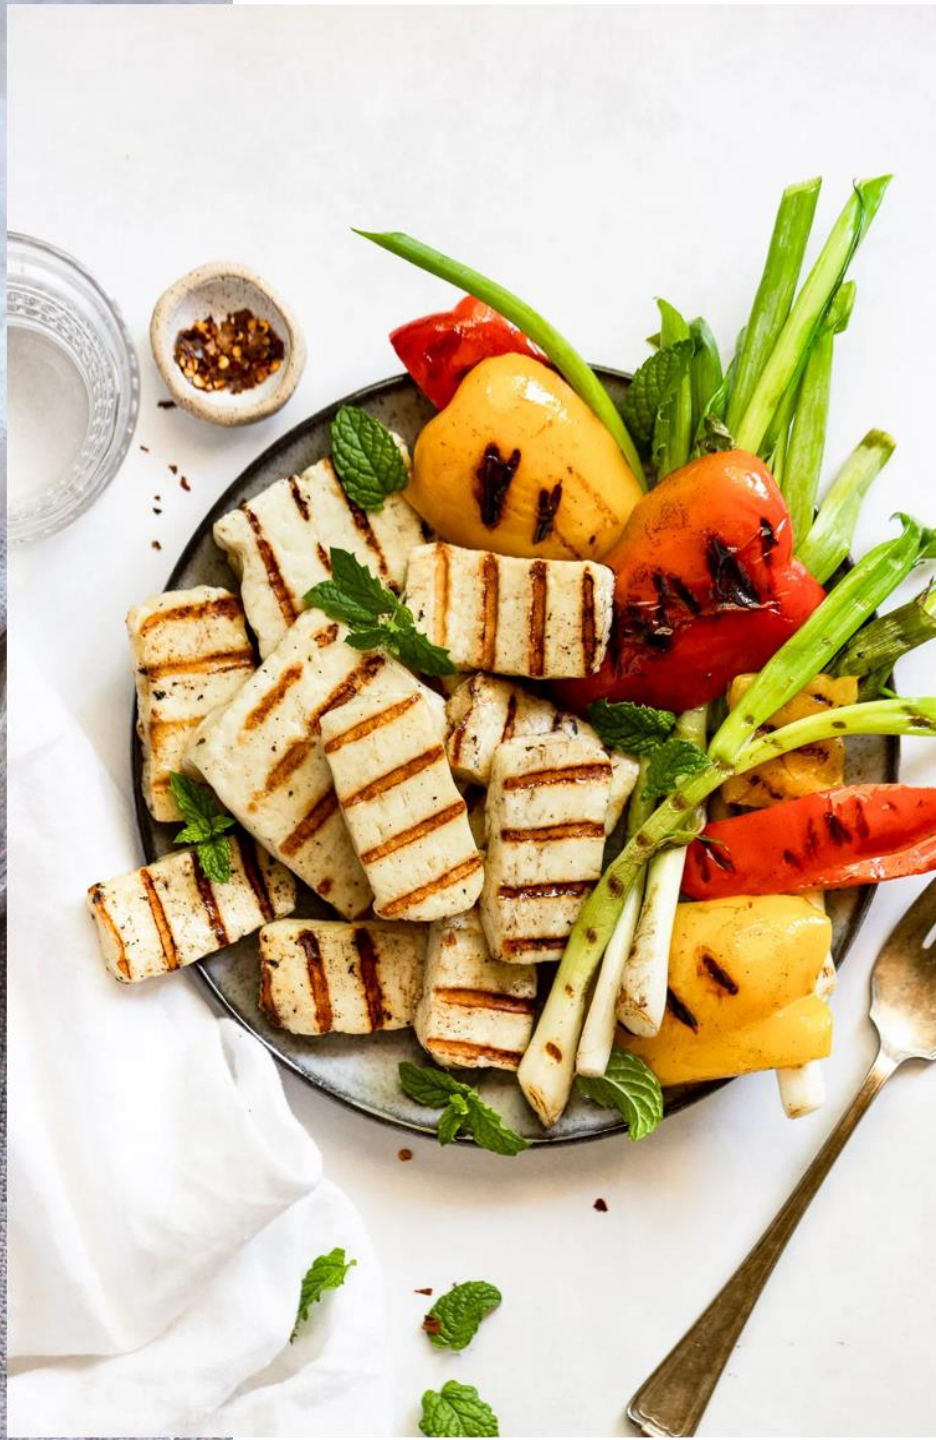

Supplement: s1 [file s1]
