# Supplementary material
Source: MDPI journal article supplement (https://www.mdpi.com/2673-4591/37/1/109)
Supplement: s1 [file s1]

# Tables - Supplementary

**Table S1.** Textural Properties of Halloumi cheese fortified with Garlic & Pepper powder (GPP) during storage at  $10 \pm 1$  °C for 35 days.

| Texture Property | Storage Period                |                                |                                |                                 |                               |
|------------------|-------------------------------|--------------------------------|--------------------------------|---------------------------------|-------------------------------|
|                  | 7 <sup>th</sup> Day           | 14 <sup>th</sup> Day           | 21 <sup>st</sup> Day           | 28 <sup>th</sup> Day            | 35 <sup>th</sup> Day          |
| Hardness         | 4.20 <sup>d</sup> $\pm$ 0.35  | 5.13 <sup>bc</sup> $\pm$ 0.21  | 5.31 <sup>bc</sup> $\pm$ 0.03  | 5.73 <sup>ab</sup> $\pm$ 0.35   | 6.11 <sup>a</sup> $\pm$ 0.22  |
| Gumminess        | 1.99 <sup>d</sup> $\pm$ 0.17  | 2.76 <sup>bc</sup> $\pm$ 0.38  | 3.10 <sup>abc</sup> $\pm$ 0.28 | 3.35 <sup>ab</sup> $\pm$ 0.16   | 3.57 <sup>a</sup> $\pm$ 0.26  |
| Cohesiveness     | 0.85 <sup>a</sup> $\pm$ 0.02  | 0.83 <sup>ab</sup> $\pm$ 0.01  | 0.81 <sup>abc</sup> $\pm$ 0.28 | 0.79 <sup>abcd</sup> $\pm$ 0.05 | 0.74 <sup>cd</sup> $\pm$ 0.02 |
| Chewiness        | 2.31 <sup>cd</sup> $\pm$ 0.36 | 2.59 <sup>bcd</sup> $\pm$ 0.23 | 2.83 <sup>abc</sup> $\pm$ 0.90 | 3.11 <sup>ab</sup> $\pm$ 0.22   | 3.34 <sup>a</sup> $\pm$ 0.49  |

Values are mean  $\pm$  SD (n = 3). Means with different superscript lowercase letters in the same row are significantly different (P<0.05).

**Table S2.** Microbial count of total bacteria, *E. coli*, yeasts & molds, *S. aureus* and LAB during storage time

| Storage time (Days) | Microbial count of total bacteria (log CFU/g) | Microbial count of <i>E. coli</i> (log CFU/g) | Microbial count of yeasts & molds (log CFU/g) | Microbial count of <i>S. aureus</i> (log CFU/g) | Microbial count of LAB (log CFU/g) |
|---------------------|-----------------------------------------------|-----------------------------------------------|-----------------------------------------------|-------------------------------------------------|------------------------------------|
| 1                   | 2.51 $\pm$ 0.03 <sup>d</sup>                  | 0.00 $\pm$ 0.00 <sup>d</sup>                  | 0.00 $\pm$ 0.00 <sup>e</sup>                  | 1.92 $\pm$ 0.03 <sup>a</sup>                    | 0.00 $\pm$ 0.00 <sup>d</sup>       |
| 10                  | 2.71 $\pm$ 0.09 <sup>c</sup>                  | 1.00 $\pm$ 0.00 <sup>c</sup>                  | 1.10 $\pm$ 0.17 <sup>d</sup>                  | 1.63 $\pm$ 0.13 <sup>b</sup>                    | 2.49 $\pm$ 0.01 <sup>c</sup>       |
| 20                  | 2.70 $\pm$ 0.02 <sup>c</sup>                  | 1.20 $\pm$ 0.17 <sup>c</sup>                  | 1.42 $\pm$ 0.10 <sup>c</sup>                  | 1.59 $\pm$ 0.11 <sup>bc</sup>                   | 2.53 $\pm$ 0.01 <sup>c</sup>       |
| 30                  | 3.77 $\pm$ 0.05 <sup>b</sup>                  | 1.88 $\pm$ 0.03 <sup>b</sup>                  | 1.92 $\pm$ 0.08 <sup>b</sup>                  | 1.59 $\pm$ 0.11 <sup>bcd</sup>                  | 2.68 $\pm$ 0.02 <sup>a</sup>       |
| 40                  | 4.78 $\pm$ 0.02 <sup>a</sup>                  | 2.16 $\pm$ 0.02 <sup>a</sup>                  | 2.30 $\pm$ 0.04 <sup>a</sup>                  | 1.36 $\pm$ 0.10 <sup>bcd</sup>                  | 2.62 $\pm$ 0.02 <sup>b</sup>       |

Values are mean  $\pm$  SD (n=3). Means with different superscript letters indicated significantly different (P<0.05).
